# Supplementary material
Source: Springer Nature journal article supplement (https://www.springermedizin.de/resource/supplementary/12885_2007_959_MOESM3_ESM.pdf/9471234)

Pre WOC

Post WOC – WM

Post WOC – H&amp;E

No RCM

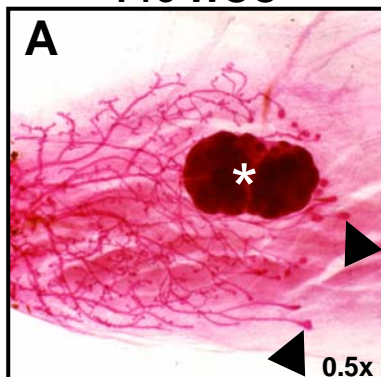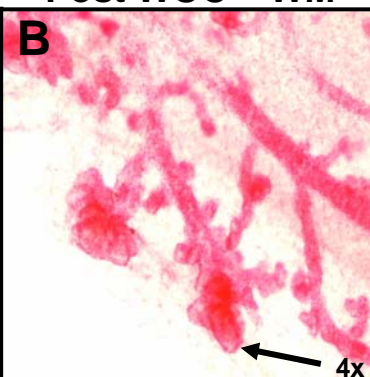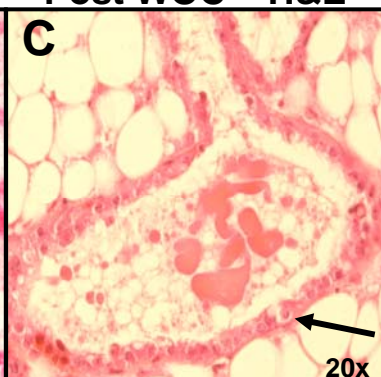

PBS

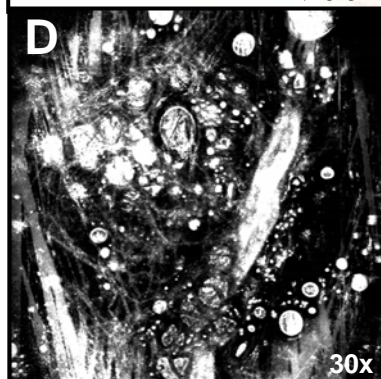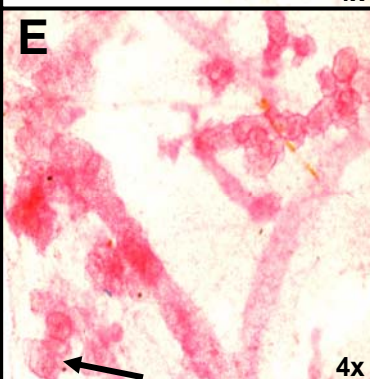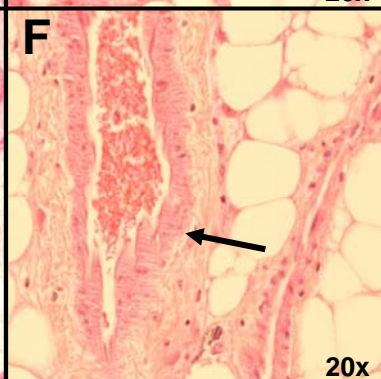

1% Acetic

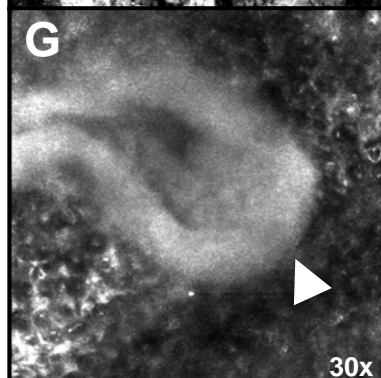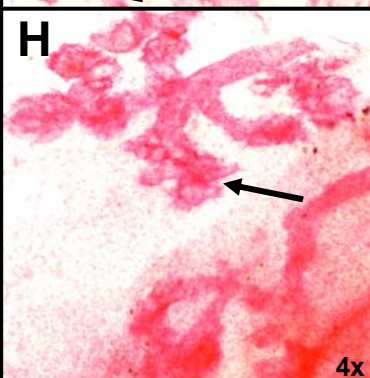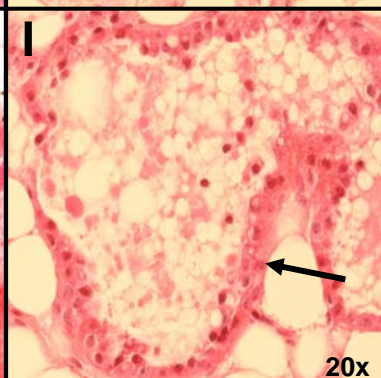

3% Acetic

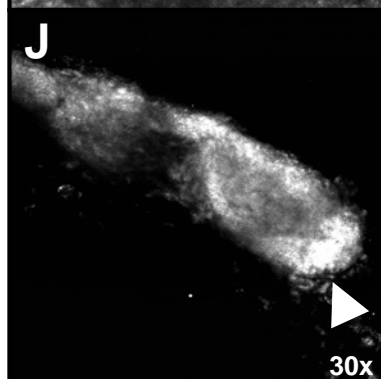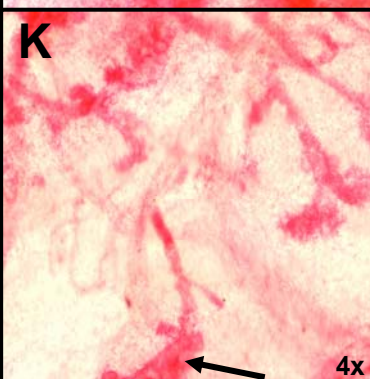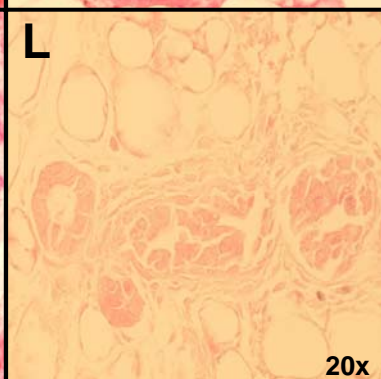

5% Acetic

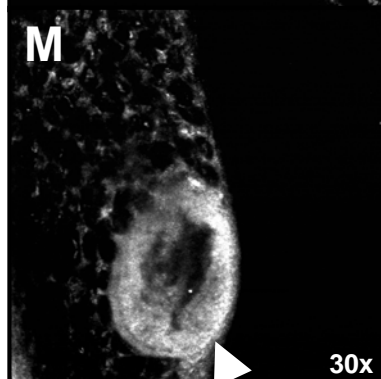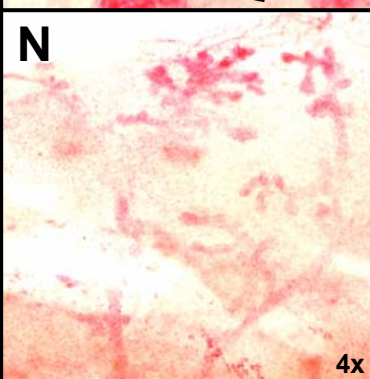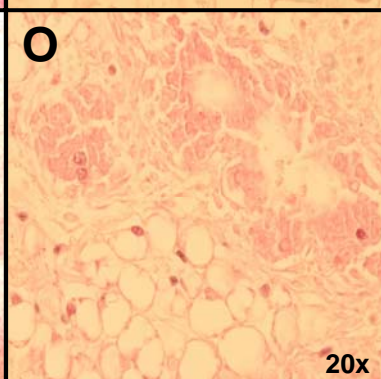

Supplement: MOESM3 [file 9471234]
